# Supplementary material for: Multiple plasma membrane reporters discern LHFPL5 region that blocks trafficking to the plasma membrane
Source: PubMed Central journal article supplement (PMC9925724; doi:10.1038/s41598-023-28045-w), 2023-02-13
Supplement: 41598_2023_28045_MOESM1_ESM.pdf [file 41598_2023_28045_MOESM1_ESM.pdf]

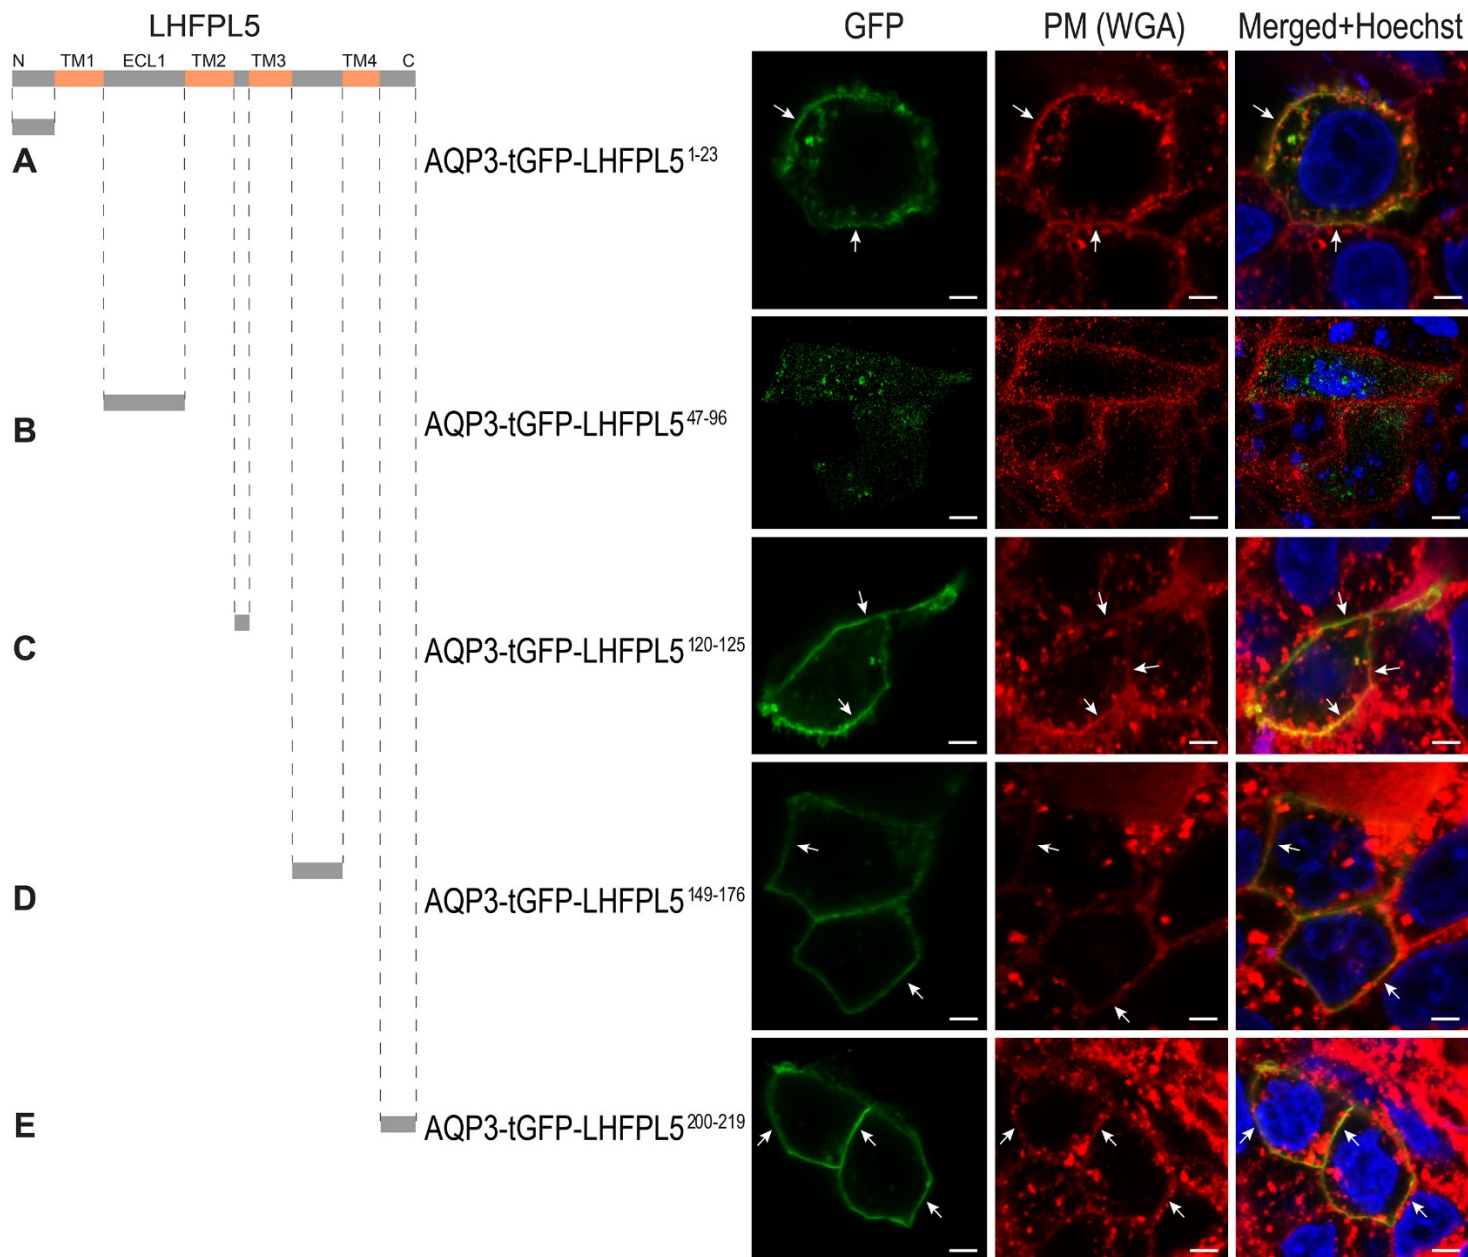

**Supplement Figure 1. Key experiments are reproduced in CHO cell lines.** **A)** The N-terminus fragment of LHFPL5 comprising residues LHFPL5<sup>1-23</sup>, does not preclude trafficking of the AGR system to the plasma membrane (PM) when expressed in CHO cells. **B)** Extracellular loop 1, consisting of the LHFPL5<sup>47-96</sup> fragment, also halts any detectable trafficking to the PM when expressed in CHO cells. **C-E)** AGR-based constructs containing the remaining intracellular loop 1, LHFPL5<sup>120-125</sup> (C), extracellular loop 2, LHFPL5<sup>149-176</sup> (D) or the C-terminus, LHFPL5<sup>200-219</sup> (E) show PM labeling when expressed in CHO cells. To label the PM, wheat germ agglutinin (WGA) Alexa Fluor 594 conjugate was used (ThermoFisher Scientific, MA). Scale bars: 10  $\mu$ m.
